# Supplementary material for: A selectively processible instant glue passivation layer for indium gallium zinc oxide thin-film transistors fabricated at low temperature
Source: Royal Society of Chemistry journal article supplement (doi:10.1039/c8tc01762j), 2018-01-01
Supplement: c8tc01762j1.pdf [file c8tc01762j1.pdf]

## Supporting Information

### **Selectively Processible Instant Glue Passivation Layer for Indium–Gallium–Zinc Oxide Thin-Film Transistor Fabricating at Low Temperature**

*Hyukjoon Yoo<sup>a</sup>, ‡, Young Jun Tak<sup>a</sup>, Won-Gi Kim<sup>a</sup>, Yeong-gyu Kim<sup>a</sup>, and Hyun Jae Kim<sup>a</sup>, \**

*<sup>a</sup>School of Electrical and Electronic Engineering, Yonsei University, 50 Yonsei-ro, Seodaemun-gu, Seoul 120-749, Republic of Korea.*

*\*E-mail: [hjk3@yonsei.ac.kr](mailto:hjk3@yonsei.ac.kr)*

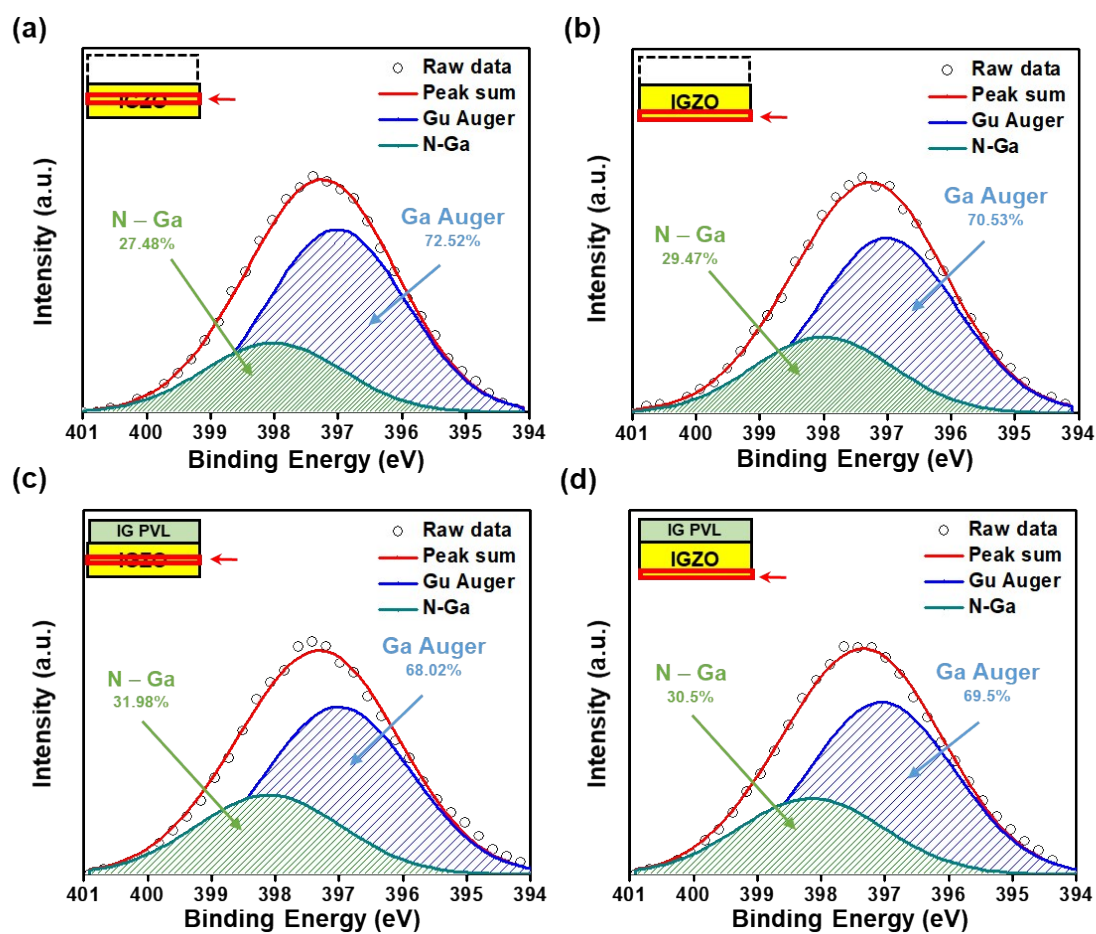

**Figure S1.** Deconvoluted XPS N1s spectra for (a) bulk channel and (b) front channel of IGZO films without PVL, and for (c) bulk channel and (d) front channel of IGZO films with IG PVL.

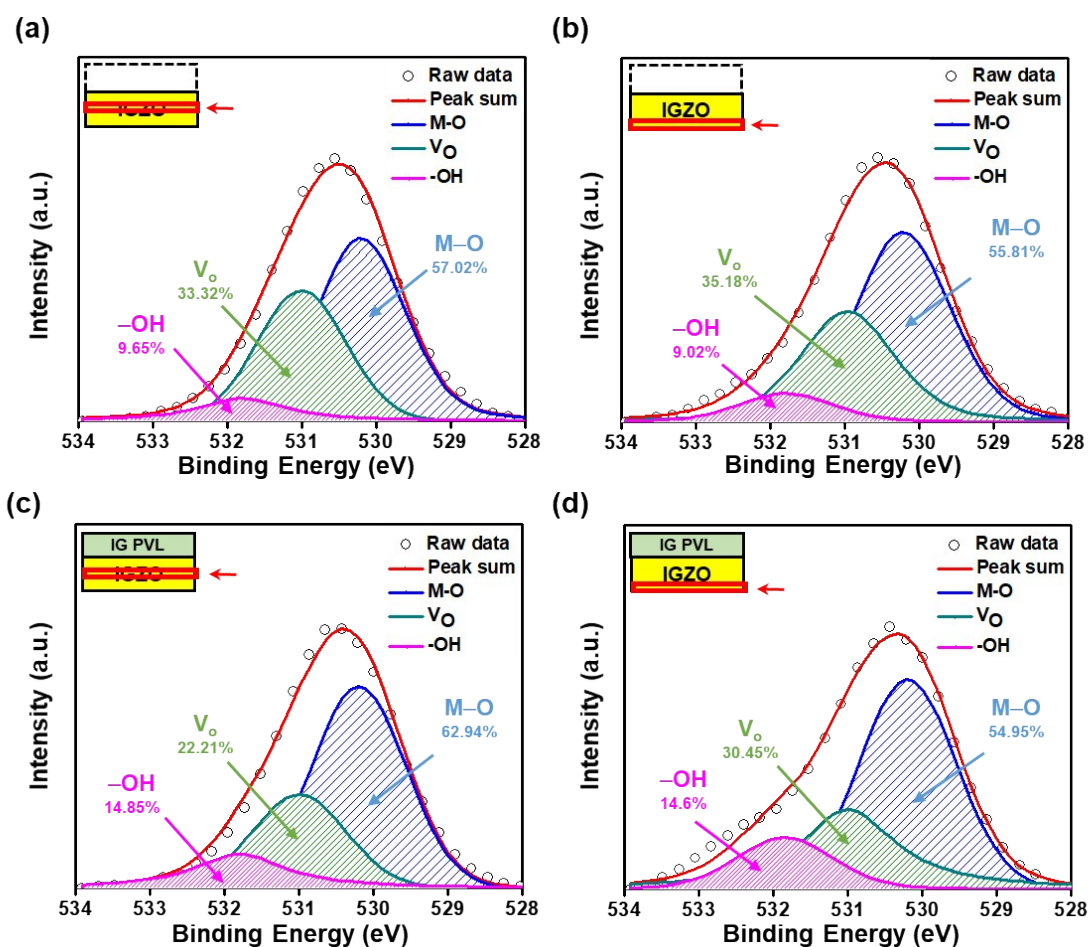

**Figure S2.** Deconvoluted XPS O1s spectra for (a) bulk channel and (b) front channel of IGZO films without PVL, and for (c) bulk channel and (d) front channel of IGZO films with IG PVL.
